# Supplementary material
Source: publisher figshare collection journal article supplement (https://acs.figshare.com/ndownloader/files/4265650)
Supplement: Supplementary file 1 [file 4265650]

## Supporting Information

# A Novel Eleven Vertex, Eleven-Skeletal Electron Pair Tantalaborane of Unusual Shape

*Shubhankar Kumar Bose and Sundargopal Ghosh\**

Department of Chemistry, Indian Institute of Technology Madras, Chennai 600 036, India

*sgghosh@iitm.ac.in*

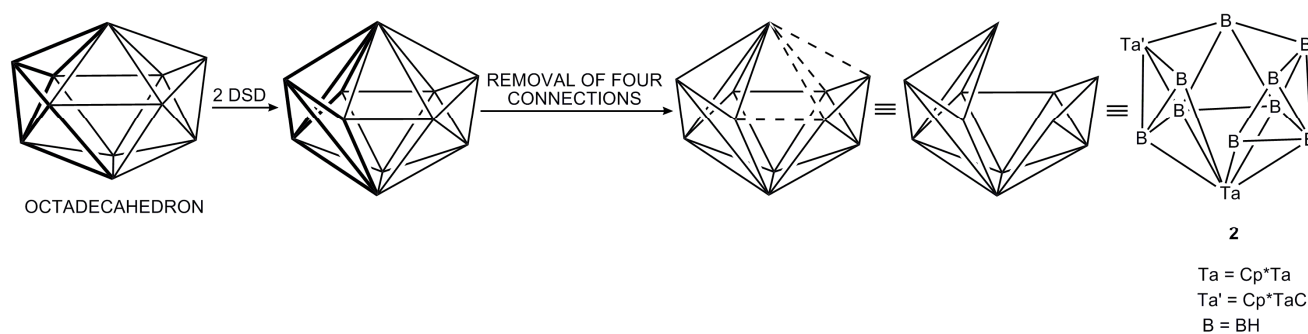

Figure S1. The observed geometry of **2** is generated from an octadecahedron by performing two dsd rearrangements (bold lines) followed by removal of four connections (dashed lines).
